# Supplementary material for: First-Generation Graduates in OECD Countries
Source: Research Square preprint supplement (doi:10.21203/rs.3.rs-6256031/v1), 2025-03-26
Supplement: Supplementary file 1 [file 422cd9bfe61a551894ff14e5.pdf]

## Appendix A. Additional results

Figure A.1: Relative Earnings in hourly wages

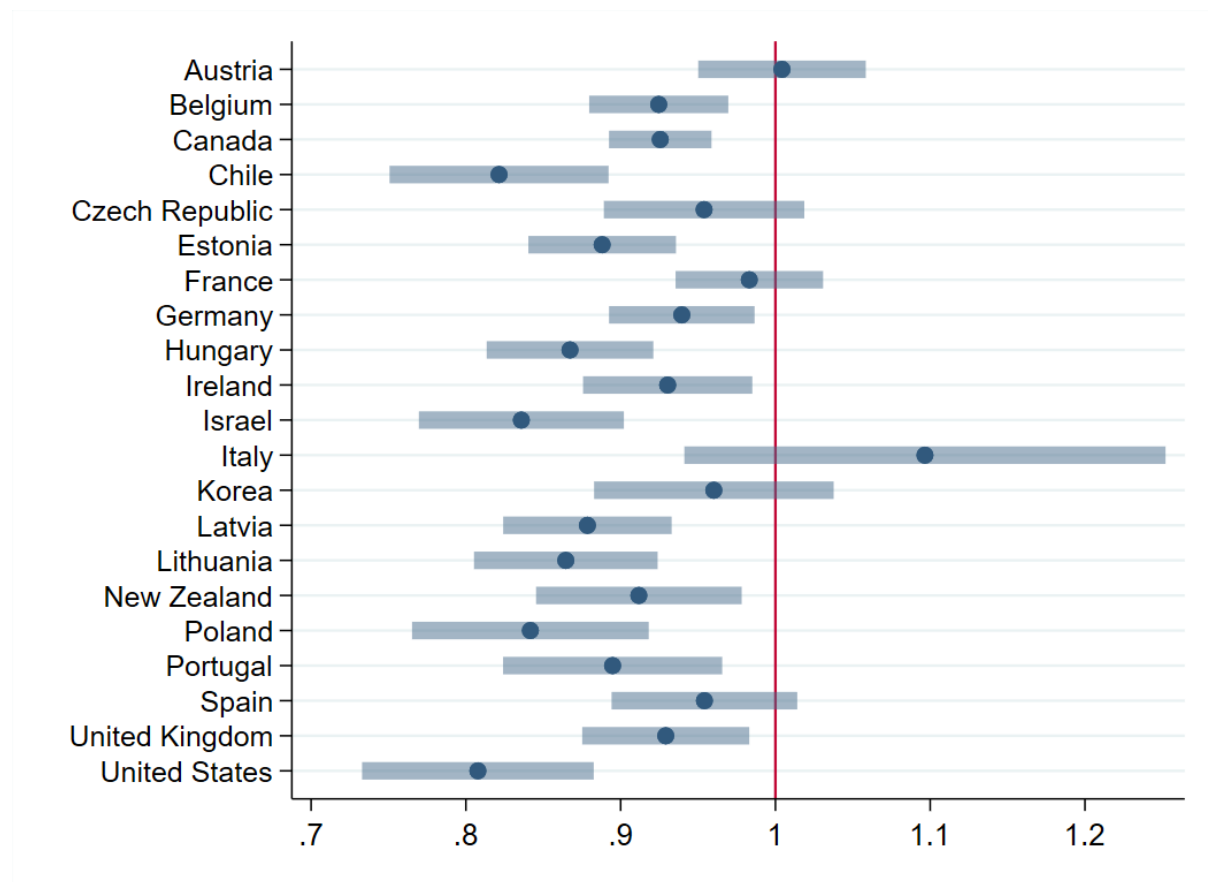

*Note:* The figure shows the ratios of the hourly wages of first- over continuing-generation graduates (conditional on age and gender). A number smaller than one indicates that first-generation graduates earn less than continuing-generation graduates. The shaded bars represent 95% confidence intervals.

Figure A.2: Relative Earnings for graduates with the same type of degree

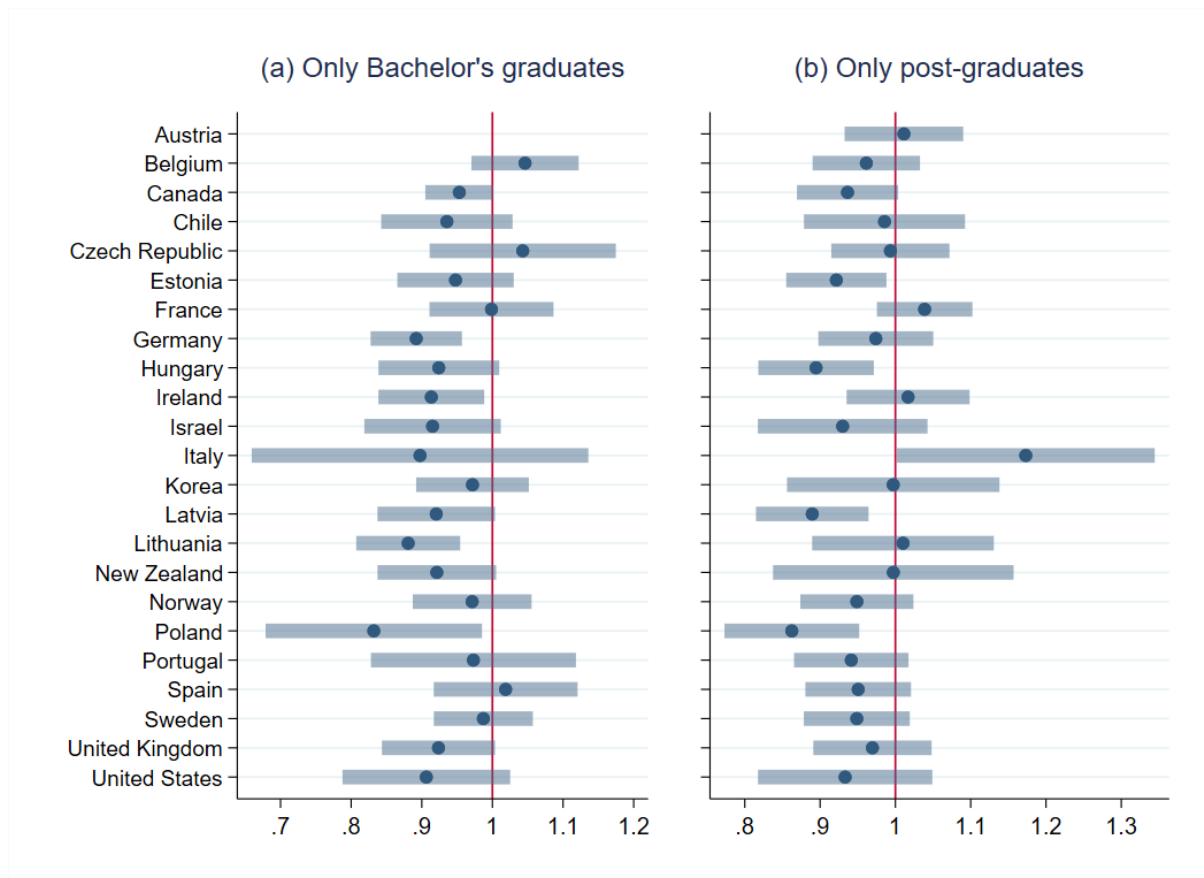

*Note:* The figure displays the earnings ratios for first-generation graduates relative to continuing-generation graduates. A ratio below one indicates that first-generation graduates' earnings are smaller than that of continuing-generation graduates. The shaded bars represent 95% confidence intervals. Austria is an outlier: the earnings ratio for those with only a bachelor is 1.26 (not displayed to ease readability).

Figure A.3: Occupation types and firm size

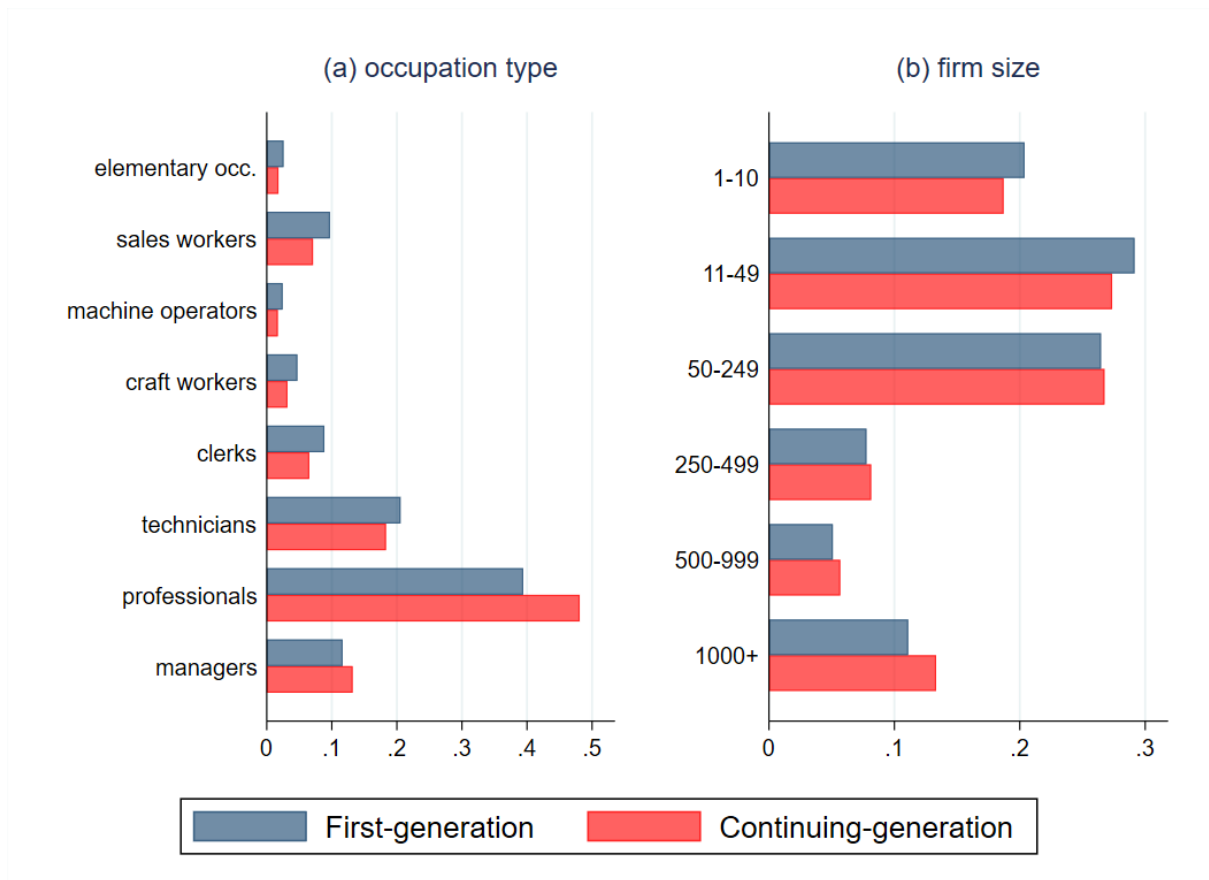

*Note:* The figure shows the distribution of graduates (conditional on age, gender and country fixed effects) by type of occupation (panel (a)) and firm size (panel (b)) separately for first- and continuing-generation graduates. The classification of occupation types is based on the authors' recoding of the official ISCO-2008. The categories for firm size are taken from PIAAC.

Table A.1: Summary Statistics (averages)

|       | numeracy | male | graduate | NoCollege<br>NoCollegeParent | NoCollege<br>CollegeParent | College<br>NoCollegeParent | College<br>CollegeParent | observations |
|-------|----------|------|----------|------------------------------|----------------------------|----------------------------|--------------------------|--------------|
| AUT   | 279.9    | 0.46 | 0.45     | 0.46                         | 0.09                       | 0.24                       | 0.22                     | 2251         |
| BEL   | 290.1    | 0.47 | 0.59     | 0.33                         | 0.08                       | 0.27                       | 0.32                     | 1884         |
| CAN   | 281.7    | 0.48 | 0.62     | 0.26                         | 0.12                       | 0.27                       | 0.35                     | 5770         |
| CHL   | 225.2    | 0.43 | 0.47     | 0.46                         | 0.07                       | 0.31                       | 0.16                     | 2331         |
| CZE   | 275.1    | 0.42 | 0.32     | 0.57                         | 0.11                       | 0.19                       | 0.13                     | 2802         |
| EST   | 289.3    | 0.47 | 0.52     | 0.32                         | 0.17                       | 0.22                       | 0.29                     | 3260         |
| FRA   | 273.1    | 0.48 | 0.54     | 0.39                         | 0.06                       | 0.32                       | 0.23                     | 2977         |
| DEU   | 287.6    | 0.48 | 0.47     | 0.36                         | 0.17                       | 0.18                       | 0.29                     | 2409         |
| HUN   | 258.0    | 0.49 | 0.36     | 0.57                         | 0.07                       | 0.20                       | 0.16                     | 2620         |
| IRL   | 267.4    | 0.43 | 0.66     | 0.28                         | 0.06                       | 0.36                       | 0.30                     | 2243         |
| ISR   | 247.2    | 0.50 | 0.49     | 0.40                         | 0.11                       | 0.21                       | 0.27                     | 3042         |
| ITA   | 243.0    | 0.46 | 0.23     | 0.75                         | 0.02                       | 0.18                       | 0.06                     | 2348         |
| KOR   | 261.4    | 0.48 | 0.67     | 0.30                         | 0.03                       | 0.45                       | 0.22                     | 3594         |
| LVA   | 262.8    | 0.45 | 0.48     | 0.42                         | 0.10                       | 0.26                       | 0.22                     | 2933         |
| LTU   | 249.9    | 0.40 | 0.48     | 0.37                         | 0.15                       | 0.19                       | 0.29                     | 2890         |
| NZL   | 257.2    | 0.42 | 0.53     | 0.35                         | 0.12                       | 0.22                       | 0.31                     | 1987         |
| NOR   | 299.6    | 0.46 | 0.69     | 0.22                         | 0.09                       | 0.29                       | 0.40                     | 2029         |
| POL   | 241.9    | 0.50 | 0.31     | 0.67                         | 0.02                       | 0.24                       | 0.07                     | 2861         |
| PRT   | 259.5    | 0.41 | 0.45     | 0.51                         | 0.04                       | 0.29                       | 0.16                     | 1723         |
| ESP   | 258.7    | 0.46 | 0.49     | 0.45                         | 0.06                       | 0.32                       | 0.17                     | 3116         |
| SWE   | 297.4    | 0.52 | 0.56     | 0.26                         | 0.18                       | 0.20                       | 0.36                     | 1678         |
| GBR   | 280.5    | 0.43 | 0.60     | 0.32                         | 0.08                       | 0.33                       | 0.27                     | 2376         |
| USA   | 256.0    | 0.47 | 0.52     | 0.31                         | 0.17                       | 0.18                       | 0.34                     | 1738         |
| Total | 264.0    | 0.46 | 0.52     | 0.39                         | 0.09                       | 0.28                       | 0.24                     | 2610         |

*Note:* The table reports the means of the indicated variables in the samples used in our main analysis.

Table A.2: Average earnings conditional on gender and age

|     | NoCollege<br>NoCollegeParent | NoCollege<br>CollegeParent | College<br>NoCollegeParent | College<br>CollegeParent |
|-----|------------------------------|----------------------------|----------------------------|--------------------------|
| AUT | 3633                         | 3975                       | 5516                       | 5521                     |
| BEL | 3829                         | 4496                       | 6175                       | 6434                     |
| CAN | 3458                         | 3819                       | 4879                       | 5334                     |
| CHL | 1104                         | 1064                       | 2150                       | 2522                     |
| CZE | 2182                         | 2395                       | 3033                       | 3037                     |
| DEU | 3533                         | 4193                       | 5956                       | 6566                     |
| ESP | 1900                         | 2170                       | 3485                       | 3717                     |
| EST | 2298                         | 2739                       | 3523                       | 3931                     |
| FRA | 2540                         | 2867                       | 4311                       | 4420                     |
| HUN | 1823                         | 2058                       | 3191                       | 3595                     |
| IRL | 2836                         | 3019                       | 5456                       | 5845                     |
| ISR | 1632                         | 2182                       | 3397                       | 4040                     |
| ITA | 1955                         | 2359                       | 3171                       | 3083                     |
| KOR | 3232                         | 3352                       | 4085                       | 4320                     |
| LTU | 1958                         | 2111                       | 3153                       | 3527                     |
| LVA | 1441                         | 1961                       | 2834                       | 3147                     |
| NOR | 3981                         | 3461                       | 6674                       | 7082                     |
| NZL | 2472                         | 2913                       | 4166                       | 4581                     |
| POL | 1845                         | 2004                       | 2728                       | 3182                     |
| PRT | 1705                         | 2110                       | 3207                       | 3462                     |
| SWE | 3823                         | 4159                       | 4994                       | 5390                     |
| GBR | 2777                         | 3092                       | 4696                       | 5015                     |
| USA | 2539                         | 3221                       | 5573                       | 6606                     |

*Note:* the table reports the average predicted earnings for each of the indicated population groups in each country. These are the quantities that we describe in Section 5 as  $\hat{y}^{00}, \hat{y}^{01}, \hat{y}^{10}, \hat{y}^{11}$ .

Table A.3: Average numeracy score conditional on gender and age

|     | NoCollege<br>NoCollegeParent | NoCollege<br>CollegeParent | College<br>NoCollegeParent | College<br>CollegeParent |
|-----|------------------------------|----------------------------|----------------------------|--------------------------|
| AUT | 254                          | 272                        | 304                        | 312                      |
| BEL | 251                          | 276                        | 306                        | 320                      |
| CAN | 252                          | 273                        | 288                        | 302                      |
| CHL | 201                          | 215                        | 245                        | 261                      |
| CZE | 259                          | 275                        | 299                        | 311                      |
| DEU | 256                          | 285                        | 302                        | 320                      |
| ESP | 237                          | 247                        | 281                        | 279                      |
| EST | 261                          | 281                        | 302                        | 315                      |
| FRA | 242                          | 258                        | 293                        | 304                      |
| HUN | 235                          | 263                        | 287                        | 302                      |
| IRL | 237                          | 251                        | 276                        | 288                      |
| ISR | 218                          | 244                        | 263                        | 279                      |
| ITA | 234                          | 259                        | 267                        | 277                      |
| KOR | 238                          | 258                        | 267                        | 281                      |
| LTU | 229                          | 242                        | 261                        | 273                      |
| LVA | 239                          | 261                        | 278                        | 291                      |
| NOR | 270                          | 281                        | 305                        | 317                      |
| NZL | 219                          | 246                        | 269                        | 295                      |
| POL | 232                          | 243                        | 260                        | 270                      |
| PRT | 234                          | 255                        | 283                        | 298                      |
| SWE | 273                          | 285                        | 313                        | 319                      |
| GBR | 256                          | 269                        | 290                        | 302                      |
| USA | 214                          | 238                        | 269                        | 297                      |

*Note:* The table reports the average predicted numeracy scores for each of the indicated population groups in each country. These are the quantities that we describe in Section 5 as  $\hat{n}^{00}, \hat{n}^{01}, \hat{n}^{10}, \hat{n}^{11}$ .

Table A.4: Results from interval regression of monthly earnings

|                         | AUT            | BEL            | CAN            | CHL           | CZE           | EST            | FRA            | DEU            | HUN           | IRL            | ISR            | ITA            |
|-------------------------|----------------|----------------|----------------|---------------|---------------|----------------|----------------|----------------|---------------|----------------|----------------|----------------|
|                         | b/se           | b/se           | b/se           | b/se          | b/se          | b/se           | b/se           | b/se           | b/se          | b/se           | b/se           | b/se           |
| NoCollege&CollegeParent | 342<br>(195)   | 667<br>(247)   | 361<br>(130)   | -40<br>(126)  | 214<br>(98)   | 442<br>(112)   | 327<br>(159)   | 660<br>(167)   | 235<br>(132)  | 184<br>(301)   | 550<br>(168)   | 405<br>(253)   |
| College&NoCollegeParent | 1,883<br>(136) | 2,346<br>(166) | 1,421<br>(102) | 1,046<br>(73) | 851<br>(79)   | 1,225<br>(103) | 1,771<br>(91)  | 2,423<br>(163) | 1,368<br>(83) | 2,620<br>(171) | 1,765<br>(136) | 1,216<br>(107) |
| College&CollegeParent   | 1,888<br>(141) | 2,605<br>(161) | 1,876<br>(97)  | 1,418<br>(91) | 855<br>(90)   | 1,634<br>(96)  | 1,879<br>(102) | 3,033<br>(143) | 1,772<br>(91) | 3,010<br>(181) | 2,408<br>(126) | 1,128<br>(182) |
| 1=male                  | 2,181<br>(108) | 1,551<br>(129) | 1,470<br>(75)  | 835<br>(63)   | 1,233<br>(60) | 1,351<br>(76)  | 1,036<br>(76)  | 2,006<br>(114) | 877<br>(64)   | 1,891<br>(139) | 1,219<br>(103) | 1,495<br>(80)  |
| 1=age 35-44             | 103<br>(132)   | 721<br>(158)   | 660<br>(94)    | 310<br>(75)   | 246<br>(75)   | 150<br>(95)    | 508<br>(97)    | 247<br>(140)   | 132<br>(82)   | 446<br>(175)   | 203<br>(119)   | 451<br>(100)   |
| 1=age 45-54             | 722<br>(134)   | 1,180<br>(160) | 795<br>(95)    | 266<br>(78)   | 298<br>(74)   | -101<br>(95)   | 823<br>(97)    | 634<br>(142)   | 278<br>(78)   | 580<br>(183)   | 507<br>(123)   | 647<br>(95)    |
| N                       | 2,094          | 1,765          | 5,585          | 2,061         | 2,607         | 2,942          | 2,738          | 2,310          | 2,354         | 2,080          | 2,586          | 1,997          |

|                         | KOR            | LVA           | LTU            | NZL            | NOR            | POL            | PRT            | ESP            | SWE            | GBR            | USA            |
|-------------------------|----------------|---------------|----------------|----------------|----------------|----------------|----------------|----------------|----------------|----------------|----------------|
|                         | b/se           | b/se          | b/se           | b/se           | b/se           | b/se           | b/se           | b/se           | b/se           | b/se           | b/se           |
| NoCollege&CollegeParent | 120<br>(342)   | 520<br>(117)  | 153<br>(114)   | 441<br>(200)   | -519<br>(335)  | 158<br>(215)   | 405<br>(213)   | 270<br>(163)   | 335<br>(147)   | 314<br>(228)   | 683<br>(286)   |
| College&NoCollegeParent | 853<br>(128)   | 1,393<br>(84) | 1,195<br>(105) | 1,695<br>(160) | 2,694<br>(234) | 883<br>(76)    | 1,503<br>(92)  | 1,585<br>(86)  | 1,171<br>(139) | 1,918<br>(141) | 3,035<br>(280) |
| College&CollegeParent   | 1,088<br>(159) | 1,706<br>(88) | 1,569<br>(92)  | 2,109<br>(146) | 3,101<br>(224) | 1,337<br>(133) | 1,757<br>(118) | 1,817<br>(105) | 1,567<br>(124) | 2,238<br>(149) | 4,067<br>(237) |
| 1=male                  | 2,070<br>(107) | 905<br>(69)   | 928<br>(77)    | 1,645<br>(120) | 2,766<br>(164) | 878<br>(62)    | 663<br>(82)    | 995<br>(75)    | 925<br>(95)    | 1,654<br>(116) | 1,548<br>(191) |
| 1=age 35-44             | 385<br>(138)   | 56<br>(88)    | -47<br>(93)    | 506<br>(146)   | 1,058<br>(203) | 192<br>(75)    | 325<br>(100)   | 578<br>(97)    | 430<br>(118)   | 342<br>(139)   | 613<br>(230)   |
| 1=age 45-54             | 543<br>(143)   | -281<br>(87)  | -237<br>(90)   | 692<br>(147)   | 1,573<br>(206) | 223<br>(78)    | 517<br>(99)    | 675<br>(95)    | 677<br>(119)   | 379<br>(145)   | 903<br>(240)   |
| N                       | 3,508          | 2,572         | 2,539          | 1,846          | 1,171          | 2,055          | 1,551          | 2,749          | 1,408          | 2,262          | 1,637          |

*Note:* the table reports the coefficients and the standard errors of the interval regression model described in Section 5.



## 6 Appendix B. Literature Review

While extensive research has been conducted on the undergraduate experiences of first-generation college students, their labour market outcomes post-graduation remain largely unexplored. The existing literature predominantly focuses on the United States ([4, 5, 2, 3]) and England ([1]), leaving a gap in our understanding of first-generation graduates in other countries. Additionally, most of this evidence is derived from cohort studies, which may not reflect experiences broadly applicable across different cohorts and can be challenging to generalise. Furthermore, existing studies typically examine labour market outcomes within a narrow timeframe of 1 to 10 years after graduation, an interval too brief to fully encompass the peculiar career trajectories of first-generation graduates.

The first available evidence on first-generation graduates' outcomes comes from [5]. Analysing the outcomes of those who completed their bachelor's degrees in 1992/1993 in the US, they find a small and insignificant wage penalty for first-generation graduates 1 year after graduation, which, however, increases to 4% and becomes significant at the end of the fourth year in the labour market. Larger gaps of 11% and 9%, respectively, for men and women are found by [4] for the same cohort 10 years after graduation. The gap, especially for men, is well explained by first-generation graduates' different labour market choices (industry, occupation, hours worked, and location), which suggests that labour market factors, rather than educational ones, largely contribute to this gap.

In England, the only existing evidence on the labour market outcomes of first-generation graduates comes from [1]. Analysing data of the cohort born in 1989/1990, they find a 7.4% wage penalty for first-generation female graduates at age 25/26, but not for men. Two-thirds of the wage penalty for first-generation women is accounted for by factors like lower pre-university educational attainment, not attending elite universities, choosing degree courses with lower expected earnings, working in smaller firms, employment in non-degree-requiring jobs, and motherhood. First-generation men are different from continuing-generation men in their characteristics (working in jobs that do not require their degree and working in smaller firms), but they have higher returns on those characteristics. This could be because men are generally less likely to graduate, hence first-generation male graduates might be a more select group.

## References

- [1] Anna Adamecz-Volgyi, Morag Henderson, and Nikki Shure. The labor market returns to “first-in-family” university graduates. *Journal of Population Economics*, 36(3): 1395–1429, 2023.
- [2] William R. Emmons, Ana H. Kent, and Lowell R. Ricketts. Is College Still Worth

It? The New Calculus of Falling Returns. *Review*, 101(4), 2019. doi: 10.20955/r.101.297-329.

- [3] Fry, Richard. First-Generation College Graduates Lag Behind Their Peers on Key Economic Outcomes. Technical report, Pew Research Center, 2021.
- [4] Anna Manzoni and Jessi Streib. The Equalizing Power of a College Degree for First-Generation College Students: Disparities Across Institutions, Majors, and Achievement Levels. *Research in Higher Education*, 60(5):577–605, 2019.
- [5] Scott L. Thomas and Liang Zhang. Post-Baccalaureate Wage Growth within Four Years of Graduation: The Effects of College Quality and College Major. *Research in Higher Education*, 46(4):437–459, June 2005. ISSN 0361-0365, 1573-188X. doi: 10.1007/s11162-005-2969-y.
